# Supplementary material
Source: publisher site journal article supplement (https://www.dovepress.com/article/504303)

**Table S1** Unweighted population characteristics by the presence of sensory impairment

|  | | | | |
| --- | --- | --- | --- | --- |
| **Variables** | **Overall**  **(N = 8,043)** | **Non-sensory impairment**  **(N = 5,860)** | **Sensory impairment**  **(N = 2,183)** | ***P*-value** |
| Age, mean (SD) | 53.69 (16.45) | 51.59 (16.48) | 59.34 (14.98) | <0.001 |
| Gender, n (%) |  |  |  | 0.184 |
| Male | 3,979.00 (49.47%) | 2,926.00 (49.93%) | 1,053.00 (48.24%) |  |
| Female | 4,064.00 (50.53%) | 2,934.00 (50.07%) | 1,130.00 (51.76%) |  |
| Race, n (%) |  |  |  | <0.001 |
| Mexican American | 877.00 (10.90%) | 611.00 (10.43%) | 266.00 (12.19%) |  |
| Other Hispanic | 775.00 (9.64%) | 534.00 (9.11%) | 241.00 (11.04%) |  |
| Non-Hispanic White | 3,321.00 (41.29%) | 2,328.00 (39.73%) | 993.00 (45.49%) |  |
| Non-Hispanic Black | 1,921.00 (23.88%) | 1,457.00 (24.86%) | 464.00 (21.26%) |  |
| Other Race | 1,149.00 (14.29%) | 930.00 (15.87%) | 219.00 (10.03%) |  |
| Education level, n (%) |  |  |  | <0.001 |
| Less than high level | 1,849.00 (22.99%) | 1,184.00 (20.20%) | 665.00 (30.46%) |  |
| High level | 1,752.00 (21.78%) | 1,242.00 (21.19%) | 510.00 (23.36%) |  |
| More than high school | 4,442.00 (55.23%) | 3,434.00 (58.60%) | 1,008.00 (46.17%) |  |
| Marital status, n (%) |  |  |  | <0.001 |
| Married/living with partner | 1,304.00 (16.21%) | 1,027.00 (17.53%) | 277.00 (12.69%) |  |
| Widowed/divorced/separated | 4,679.00 (58.17%) | 3,494.00 (59.62%) | 1,185.00 (54.28%) |  |
| Never married | 2,060.00 (25.61%) | 1,339.00 (22.85%) | 721.00 (33.03%) |  |
| PIR, mean (SD) | 2.48 (1.59) | 2.62 (1.61) | 2.11 (1.50) | <0.001 |
| Body mass index, mean (SD) | 29.11 (6.86) | 28.85 (6.75) | 29.81 (7.09) | <0.001 |
| Hyperlipidemia, n (%) | 4,956.00 (61.62%) | 3,480.00 (59.39%) | 1,476.00 (67.61%) | <0.001 |
| Diabetes, n (%) | 1,221.00 (15.18%) | 784.00 (13.38%) | 437.00 (20.02%) | <0.001 |
| Hypertension, n (%) | 3,997.00 (49.70%) | 2,641.00 (45.07%) | 1,356.00 (62.12%) | <0.001 |
| Cardiovascular disease, n (%) | 703.00 (8.74%) | 378.00 (6.45%) | 325.00 (14.89%) | <0.001 |
| Drinking, n (%) | 5,761.00 (71.63%) | 4,224.00 (72.08%) | 1,537.00 (70.41%) | 0.146 |
| Smoking, n (%) | 3,640.00 (45.26%) | 2,485.00 (42.41%) | 1,155.00 (52.91%) | <0.001 |
| Stroke, n (%) | 361.00 (4.49%) | 184.00 (3.14%) | 177.00 (8.11%) | <0.001 |
| Cancer, n (%) | 881.00 (10.95%) | 533.00 (9.10%) | 348.00 (15.94%) | <0.001 |
| Pain month, median (IQR) | 13.72(55.69) | 10.07(46.05) | 23.52(74.87) | <0.001 |
| Duration of pain, n (%) |  |  |  | <0.001 |
| No pain | 6,081.00 (75.61%) | 4,603.00 (78.55%) | 1,478.00 (67.70%) |  |
| <3 months | 705.00 (8.77%) | 507.00 (8.65%) | 198.00 (9.07%) |  |
| 3-6 months | 118.00 (1.47%) | 85.00 (1.45%) | 33.00 (1.51%) |  |
| > 6 months to < 1 year | 117.00 (1.45%) | 80.00 (1.37%) | 37.00 (1.69%) |  |
| 1-3 years | 337.00 (4.19%) | 199.00 (3.40%) | 138.00 (6.32%) |  |
| > 3 years | 685.00(8.52%) | 386.00(6.59%) | 299.00(13.70%) |  |
|  | | | | |

**Abbreviations:** PIR, Ratio of family income to poverty.

| **Table S2** Unweighted demographic traits based on the quantity of sensory impairments | | | | | | | |
| --- | --- | --- | --- | --- | --- | --- | --- |
| **Variables** | **Overall**  **(N = 8,043)** | **Non-sensory impairment**  **(N = 5,860)** | **One sensory impairment**  **(N = 1,630)** | **Two sensory impairments**  **(N = 449)** | **Three sensory impairments**  **(N = 87)** | **Four sensory impairments**  **(N = 17)** | ***P*-value** |
| Age, mean (SD) | 53.69 (16.45) | 51.59 (16.48) | 58.07 (15.33) | 62.80 (13.30) | 64.43 (12.90) | 63.41 (12.61) | <0.001 |
| Gender, n (%) |  |  |  |  |  |  | 0.602 |
| Male | 3,979.00 (49.47%) | 2,926.00 (49.93%) | 790.00 (48.47%) | 216.00 (48.11%) | 38.00 (43.68%) | 9.00 (52.94%) |  |
| Female | 4,064.00 (50.53%) | 2,934.00 (50.07%) | 840.00 (51.53%) | 233.00 (51.89%) | 49.00 (56.32%) | 8.00 (47.06%) |  |
| Race, n (%) |  |  |  |  |  |  | <0.001 |
| Mexican American | 877.00 (10.90%) | 611.00 (10.43%) | 194.00 (11.90%) | 63.00 (14.03%) | 6.00 (6.90%) | 3.00 (17.65%) |  |
| Other Hispanic | 775.00 (9.64%) | 534.00 (9.11%) | 182.00 (11.17%) | 45.00 (10.02%) | 12.00 (13.79%) | 2.00 (11.76%) |  |
| Non-Hispanic White | 3,321.00 (41.29%) | 2,328.00 (39.73%) | 712.00 (43.68%) | 216.00 (48.11%) | 54.00 (62.07%) | 11.00 (64.71%) |  |
| Non-Hispanic Black | 1,921.00 (23.88%) | 1,457.00 (24.86%) | 376.00 (23.07%) | 82.00 (18.26%) | 5.00 (5.75%) | 1.00 (5.88%) |  |
| Education level, n (%) |  |  |  |  |  |  | <0.001 |
| Less than high level | 1,849.00 (22.99%) | 1,184.00 (20.20%) | 476.00 (29.20%) | 154.00 (34.30%) | 25.00 (28.74%) | 10.00 (58.82%) |  |
| High level | 1,752.00 (21.78%) | 1,242.00 (21.19%) | 387.00 (23.74%) | 106.00 (23.61%) | 16.00 (18.39%) | 1.00 (5.88%) |  |
| More than high school | 4,442.00 (55.23%) | 3,434.00 (58.60%) | 767.00 (47.06%) | 189.00 (42.09%) | 46.00 (52.87%) | 6.00 (35.29%) |  |
| Marital status, n (%) |  |  |  |  |  |  | <0.001 |
| Married/living with partner | 1,304.00 (16.21%) | 1,027.00 (17.53%) | 215.00 (13.19%) | 54.00 (12.03%) | 6.00 (6.90%) | 2.00 (11.76%) |  |
| Widowed/divorced/separated | 4,679.00 (58.17%) | 3,494.00 (59.62%) | 909.00 (55.77%) | 229.00 (51.00%) | 42.00 (48.28%) | 5.00 (29.41%) |  |
| Never married | 2,060.00 (25.61%) | 1,339.00 (22.85%) | 506.00 (31.04%) | 166.00 (36.97%) | 39.00 (44.83%) | 10.00 (58.82%) |  |
| PIR, mean (SD) | 2.48 (1.59) | 2.62 (1.61) | 2.16 (1.52) | 1.95 (1.41) | 2.08 (1.44) | 2.19 (1.55) | <0.001 |
| Body mass index, mean (SD) | 29.11 (6.86) | 28.85 (6.75) | 29.79 (7.18) | 29.85 (6.77) | 30.04 (7.05) | 29.65 (7.78) | <0.001 |
| Hyperlipidemia, n (%) | 4,956.00 (61.62%) | 3,480.00 (59.39%) | 1,091.00 (66.93%) | 306.00 (68.15%) | 67.00 (77.01%) | 12.00 (70.59%) | <0.001 |
| Diabetes, n (%) | 1,221.00 (15.18%) | 784.00 (13.38%) | 309.00 (18.96%) | 105.00 (23.39%) | 17.00 (19.54%) | 6.00 (35.29%) | <0.001 |
| Hypertension, n (%) | 3,997.00 (49.70%) | 2,641.00 (45.07%) | 958.00 (58.77%) | 324.00 (72.16%) | 62.00 (71.26%) | 12.00 (70.59%) | <0.001 |
| Cardiovascular disease, n (%) | 703.00 (8.74%) | 378.00 (6.45%) | 209.00 (12.82%) | 89.00 (19.82%) | 22.00 (25.29%) | 5.00 (29.41%) | <0.001 |
| Drinking, n (%) | 5,761.00 (71.63%) | 4,224.00 (72.08%) | 1,163.00 (71.35%) | 303.00 (67.48%) | 56.00 (64.37%) | 15.00 (88.24%) | 0.061 |
| Smoking, n (%) | 3,640.00 (45.26%) | 2,485.00 (42.41%) | 847.00 (51.96%) | 251.00 (55.90%) | 46.00 (52.87%) | 11.00 (64.71%) | <0.001 |
| Stroke, n (%) | 361.00 (4.49%) | 184.00 (3.14%) | 107.00 (6.56%) | 50.00 (11.14%) | 14.00 (16.09%) | 6.00 (35.29%) | <0.001 |
| Cancer, n (%) | 881.00 (10.95%) | 533.00 (9.10%) | 248.00 (15.21%) | 76.00 (16.93%) | 19.00 (21.84%) | 5.00 (29.41%) | <0.001 |
| Pain month, median (IQR) | 13.72(55.69) | 10.07(46.05) | 20.34(67.65) | 33.51(94.30) | 28.56(88.46) | 37.83(57.55) | <0.001 |
| Duration of pain, n (%) |  |  |  |  |  |  | <0.001 |
| No pain | 6,081.00 (75.61%) | 4,603.00 (78.55%) | 1,136.00 (69.69%) | 286.00 (63.70%) | 50.00 (57.47%) | 6.00 (35.29%) |  |
| <3 months | 705.00 (8.77%) | 507.00 (8.65%) | 145.00 (8.90%) | 40.00 (8.91%) | 10.00 (11.49%) | 3.00 (17.65%) |  |
| 3-6 months | 118.00 (1.47%) | 85.00 (1.45%) | 23.00 (1.41%) | 7.00 (1.56%) | 1.00 (1.15%) | 2.00 (11.76%) |  |
| > 6 months to < 1 year | 117.00 (1.45%) | 80.00 (1.37%) | 27.00 (1.66%) | 7.00 (1.56%) | 3.00 (3.45%) | 0.00 (0.00%) |  |
| 1-3 years | 337.00 (4.19%) | 199.00 (3.40%) | 103.00 (6.32%) | 24.00 (5.35%) | 10.00 (11.49%) | 1.00 (5.88%) |  |
| > 3 years | 685.00 (8.52%) | 386.00 (6.59%) | 196.00 (12.02%) | 85.00 (18.93%) | 13.00 (14.94%) | 5.00 (29.41%) |  |
|  | | | | | | | |

**Abbreviations:** PIR, Ratio of family income to poverty.

**Figure S1** Subgroup analysis of the interaction between duration of pain and sensory impairment.


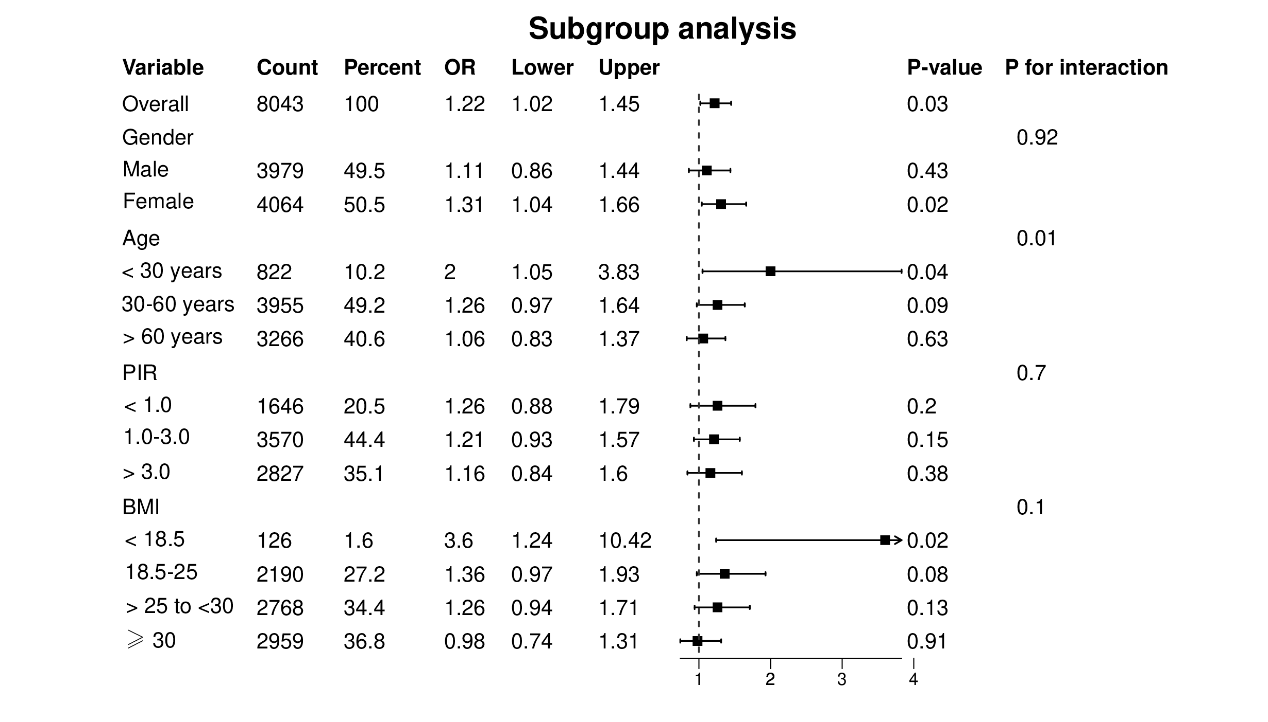

Supplement: Supplementary file 1 [file get_supplementary_file.php]
